# Supplementary material
Source: ML conference proceedings conference paper supplement (https://openaccess.thecvf.com/content/cvpr_2015/html/Xiao_Defocus_Deblurring_and_2015_CVPR_paper.html)
Supplement: Supplementary file 1 [file Xiao_Defocus_Deblurring_and_2015_CVPR_supplemental.pdf]

# Defocus Deblurring and Superresolution for Time-of-Flight Depth Cameras (Supplementary)

Lei Xiao<sup>2,1</sup> Felix Heide<sup>2,1</sup> Matthew O'Toole<sup>3</sup> Andreas Kolb<sup>4</sup> Matthias B. Hullin<sup>5</sup>  
 Kyros Kutulakos<sup>3</sup> Wolfgang Heidrich<sup>1,2</sup>  
<sup>1</sup>KAUST <sup>2</sup>University of British Columbia <sup>3</sup>University of Toronto <sup>4</sup>University of Siegen  
<sup>5</sup>University of Bonn

## 1. Algorithm Details

This section provides implementation details for Algo. 2 (Amplitude update) and Algo. 3 (Depth update) in the main paper. The symbol  $\nabla$  defines the derivative operator,  $\top$  defines the matrix transpose, and  $\mathbf{I}$  defines the identity matrix.

**Algo. 2, Line 2:**

$$\mathbf{a} = \underset{\mathbf{a}}{\operatorname{argmin}} \rho \|\mathbf{c} - \mathbf{A}\mathbf{a}\|_2^2 + \lambda_1 \rho_a \|\nabla \mathbf{a} - \mathbf{y} - \mathbf{p}_1 + \mathbf{u}_1\|_2^2 \quad (1)$$

equals to the solution of the linear equation system:

$$(\rho \mathbf{A}^\top \mathbf{A} + \lambda_1 \rho_a \nabla^\top \nabla) \mathbf{a} = \rho \mathbf{A}^\top \mathbf{c} + \lambda_1 \rho_a \nabla^\top (\mathbf{y} + \mathbf{p}_1 - \mathbf{u}_1) \quad (2)$$

and we solve it by the left division function in Matlab.

**Algo. 2, Line 3:**

$$\mathbf{y} = \underset{\mathbf{y}}{\operatorname{argmin}} \lambda_1 \|\nabla \mathbf{a} - \mathbf{y} - \mathbf{p}_1 + \mathbf{u}_1\|_2^2 + \lambda_2 \|\nabla \mathbf{y} - \mathbf{p}_2 + \mathbf{u}_2\|_2^2 \quad (3)$$

equals to the solution of the linear equation system:

$$(\lambda_1 \mathbf{I} + \lambda_2 \nabla^\top \nabla) \mathbf{y} = \lambda_1 (\nabla \mathbf{a} - \mathbf{p}_1 + \mathbf{u}_1) + \lambda_2 \nabla^\top (\mathbf{p}_2 - \mathbf{u}_2) \quad (4)$$

and solved by the left division function in Matlab.

**Algo. 2, Line 4:**

$$\mathbf{p}_1 = \underset{\mathbf{p}_1}{\operatorname{argmin}} \|\mathbf{p}_1\|_1 + \rho_a \|\nabla \mathbf{a} - \mathbf{y} - \mathbf{p}_1 + \mathbf{u}_1\|_2^2 \quad (5)$$

is a soft shrinkage problem and has closed form solution:

$$\mathbf{p}_1 = \operatorname{soft-shrinkage}(\nabla \mathbf{a} - \mathbf{y} + \mathbf{u}_1, \frac{0.5}{\rho_a}) \quad (6)$$

where the soft-shrinkage operator is defined as:

$$\operatorname{soft-shrinkage}(\mathbf{x}, \epsilon) = \begin{cases} \mathbf{x} + \epsilon; & \mathbf{x} < -\epsilon \\ \mathbf{0}; & -\epsilon \leq \mathbf{x} \leq \epsilon \\ \mathbf{x} - \epsilon; & \mathbf{x} > \epsilon \end{cases} \quad (7)$$

**Algo. 2, Line 5:**

$$\mathbf{p}_2 = \underset{\mathbf{p}_2}{\operatorname{argmin}} \|\mathbf{p}_2\|_1 + \rho_a \|\nabla \mathbf{y} - \mathbf{p}_2 + \mathbf{u}_2\|_2^2 \quad (8)$$

is a soft shrinkage problem and has closed form solution:

$$\mathbf{p}_2 = \operatorname{soft-shrinkage}(\nabla \mathbf{y} + \mathbf{u}_2, \frac{0.5}{\rho_a}) \quad (9)$$

**Algo. 3, Line 2:**

$$\mathbf{z} = \underset{\mathbf{z}}{\operatorname{argmin}} \overbrace{\rho \|\mathbf{c} - \mathbf{a} \circ \mathbf{g}(\mathbf{z})\|_2^2}^{\text{data fitting constraint}} + \overbrace{\tau_1 \rho_x \|\nabla \mathbf{z} - \mathbf{x} - \mathbf{q}_1 + \mathbf{v}_1\|_2^2}^{\text{prior constraint}} \quad (10)$$

is a nonlinear least squares problem due to the nonlinearity of the modulation function  $\mathbf{g}(\mathbf{z})$ . We solve this problem by the Levenberg-Marquardt method implemented in the `lsqnonlin(.)` function in Matlab. We provide the analytical Jacobian for acceleration:

$$J(\mathbf{z}) = \begin{bmatrix} J_{data}(\mathbf{z}) \\ J_{prior} \end{bmatrix} \quad (11)$$

where the matrix  $J_{data}(\mathbf{z})$  and  $J_{prior}$  define the Jacobian of the 1<sup>st</sup> (data fitting constraint) and 2<sup>nd</sup> (prior constraint) least squares in Eq. (10) respectively.

Since the 1<sup>st</sup> least squares are pixel-wise separable (benefit from our splitting method explained in Sec. 3.1 in the main paper),  $J_{data}(\mathbf{z})$  is simply a diagonal matrix composed of:

$$-\mathbf{a}_k \cdot \frac{\partial \mathbf{g}(\mathbf{z}_k)}{\partial \mathbf{z}_k} \cdot \sqrt{\rho} \quad (12)$$

where  $k$  is the pixel index. For the ToF cameras based on cosine model modulation (see Eq. (1) in the main paper), the diagonal element in Eq. (12) becomes:

$$-\mathbf{a}_k \cdot i \frac{4\pi f}{c} \cdot e^{i(\frac{4\pi f}{c} \cdot \mathbf{z}_k)} \cdot \sqrt{\rho} \quad (13)$$

For arbitrary modulation waveforms in the future, the diagonal element in Eq. (12) can be estimated from calibration data.  $J_{prior}$  is simply the matrix version of the derivative operator  $\nabla$  multiplied by  $\sqrt{\tau_1 \rho_x}$ , which is independent of  $\mathbf{z}$ .

**Algo. 3, Line 3:**

$$\mathbf{x} = \underset{\mathbf{x}}{\operatorname{argmin}} \tau_1 \|\nabla \mathbf{z} - \mathbf{x} - \mathbf{q}_1 + \mathbf{v}_1\|_2^2 + \tau_2 \|\nabla \mathbf{x} - \mathbf{q}_2 + \mathbf{v}_2\|_2^2 \quad (14)$$

equals to the solution of the linear equation system:

$$(\tau_1 \mathbf{I} + \tau_2 \nabla^T \nabla) \mathbf{x} = \tau_1 (\nabla \mathbf{z} - \mathbf{q}_1 + \mathbf{v}_1) + \tau_2 \nabla^T (\mathbf{q}_2 - \mathbf{v}_2) \quad (15)$$

and solved by the left division function in Matlab.

**Algo. 3, Line 4:**

$$\mathbf{q}_1 = \underset{\mathbf{q}_1}{\operatorname{argmin}} \|\mathbf{q}_1\|_1 + \rho_x \|\nabla \mathbf{z} - \mathbf{x} - \mathbf{q}_1 + \mathbf{v}_1\|_2^2 \quad (16)$$

is a soft shrinkage problem and has closed form solution:

$$\mathbf{q}_1 = \operatorname{soft-shrinkage}(\nabla \mathbf{z} - \mathbf{x} + \mathbf{v}_1, \frac{0.5}{\rho_x}) \quad (17)$$

**Algo. 3, Line 5:**

$$\mathbf{q}_2 = \underset{\mathbf{q}_2}{\operatorname{argmin}} \|\mathbf{q}_2\|_1 + \rho_x \|\nabla \mathbf{x} - \mathbf{q}_2 + \mathbf{v}_2\|_2^2 \quad (18)$$

is a soft shrinkage problem and has closed form solution:

$$\mathbf{q}_2 = \operatorname{soft-shrinkage}\left(\nabla \mathbf{x} + \mathbf{v}_2, \frac{0.5}{\rho_x}\right) \quad (19)$$
